# Supplementary material for: Development and evaluation of a patient decision aid for patients considering ongoing medical or surgical treatment options for ulcerative colitis using a mixed-methods approach: protocol for DISCUSS study
Source: PubMed Central journal article supplement — BMJ Open. 2020 Jan 14;10(1):e031845. doi: 10.1136/bmjopen-2019-031845 (PMC7045112; doi:10.1136/bmjopen-2019-031845), 2020-01-14
Supplement: bmjopen-2019-031845supp001.pdf [file bmjopen-2019-031845supp001.pdf]

## Supplementary Tables

Table S1 – Surgical outcomes systematic review inclusion/exclusion criteria

| Inclusion                                                                                                                                                                             | Exclusion                                                                                                                 |
|---------------------------------------------------------------------------------------------------------------------------------------------------------------------------------------|---------------------------------------------------------------------------------------------------------------------------|
| Studies including patients equal to or > 18 years of age                                                                                                                              | Studies on patients <18 years of age                                                                                      |
| Surgery for Ulcerative Colitis                                                                                                                                                        | Case reports, editorials, review articles                                                                                 |
| Studies report <b>any</b> outcome <sup>1</sup> after surgery                                                                                                                          | Published prior to 2002 <sup>3</sup> or data collection period extending no further than 5 years before 2002 <sup>4</sup> |
| Procedures (performed as one-, two- or three-stages; laparoscopic, open or robotic); total and subtotal colectomy, ileal pouch-anal anastomosis (IPAA), ileo-rectal anastomosis (IRA) | Clinical guidelines                                                                                                       |
| >20 patients receiving reported procedure <sup>2</sup>                                                                                                                                | <20 patients receiving reported procedure                                                                                 |
|                                                                                                                                                                                       | Non-English Language                                                                                                      |
|                                                                                                                                                                                       | No reported post-operative outcomes                                                                                       |

1. This includes short- and long-term complications, as well as quality of life measure. 2. 20 patients was the cut off as it was agreed by the steering group that studies with a smaller sample size than this could bias results. 3. 2002 was chosen as this is when biologics began to be used in clinical practice. 4. e.g. data collection period from 1998-2008.

Table S2 – Medical outcomes systematic review inclusion/exclusion criteria

| Inclusion                                                                                                                                                                                 | Exclusion                                                                                                   |
|-------------------------------------------------------------------------------------------------------------------------------------------------------------------------------------------|-------------------------------------------------------------------------------------------------------------|
| Studies including patients equal to or > 18 years of age                                                                                                                                  | Studies on patients <18 years of age                                                                        |
| Medical therapy for for Ulcerative Colitis                                                                                                                                                | Case reports, editorials, review articles                                                                   |
| Studies report any outcome <sup>1</sup> of medical therapy                                                                                                                                | Published prior to 2002 or data collection period extending no further than 5 years before 2002 (See above) |
| Medication included <sup>1</sup> ; systemic corticosteroids, immunosuppressants (Methotrexate, azathioprine, tacrolimus), biologics (Ustekinumab, Anti-Integrins, Anti-TNFs, Tofacitinib) | Clinical guidelines                                                                                         |
| >20 patients in study                                                                                                                                                                     | <20 patients in study                                                                                       |
|                                                                                                                                                                                           | Non-English Language                                                                                        |

1. Aminosaliclates were not included as the steering group agreed patients at this stage of medical therapy would not be considering surgery.

Table S3 – Systematic review of decision-making factors inclusion/exclusion criteria

| Inclusion                                                                                                                                              | Exclusion                                                                                                                          |
|--------------------------------------------------------------------------------------------------------------------------------------------------------|------------------------------------------------------------------------------------------------------------------------------------|
| Studies which have reported on the facilitators and barriers to ulcerative colitis treatment decision-making for both medical and surgical treatments. | Studies on paediatric patients (defined as under 16 years of age).                                                                 |
| Studies using qualitative, quantitative and mixed methods designs.                                                                                     | Studies published in any language other than English.                                                                              |
|                                                                                                                                                        | Studies on inflammatory bowel disease patients where the data relating to ulcerative colitis patients is not specified separately. |
|                                                                                                                                                        | Studies which have used simulated data                                                                                             |
